# Supplementary material
Source: PubMed Central journal article supplement (PMC3340093)
Supplement: 1202407109_pnas.1202407109_SI.pdf [file 1202407109_pnas.1202407109_SI.pdf]

# Supporting Information

Alvarez et al. 10.1073/pnas.1202407109

## SI Text

**S1. Calculation of  $L_{REF}$**  The values we used for  $L_{REF}$  are summarized in Table S1 and were calculated by dividing estimated fuel-cycle methane emissions, multiplied by 1.1, by the sum of the gross production of natural gas (26 Tcf in 2009) and the methane lost at production wells (570 bcf in 2009). [This adjustment accounts for the composition of  $CH_4$  in natural gas, conservatively assuming that each cubic foot of natural gas discharged to the atmosphere contains 90%  $CH_4$ , on average, across the fuel cycle. This value varies by location and by industry segment. The average  $CH_4$  content in U.S. natural gas has been reported to be 79%, 87%, and 93% for the production, processing, and transmission/distribution segments, respectively. See Shires TM, Harrison MR (1996) Methane Emissions from the Natural Gas Industry; Volume 6: Vented and Combustion Source Summary; Appendix A (Gas Research Institute and U.S. EPA). Available at [www.epa.gov/gasstar/documents/emissions\\_report/6\\_vented.pdf](http://www.epa.gov/gasstar/documents/emissions_report/6_vented.pdf). Combining the  $CH_4$  composition data in Table A-1 of the EPA/GRI report with the relative distribution of EPA's  $CH_4$  emissions data by industry segment, summarized in Table S2, would yield a weighted average of 84%.]

**S2. Estimated Emissions from Natural Gas Fuel Cycles.** For over a decade, official U.S. estimates of the amount of  $CH_4$  emitted by natural gas systems have been based on dozens of equipment-specific emission factors published in 1996 (1). In 2011, the U.S. EPA adjusted several emission factors from the 1996 report after new data indicated the older values underestimated actual emissions. Specifically, EPA revised emission factors for gas well cleanups, condensate storage tanks, and centrifugal compressors. In addition, EPA added emissions for unconventional gas well completions and workover venting (2).

We estimate  $CH_4$  emissions from natural gas systems largely following the life-cycle analysis performed by P. Jaramillo et al. (3). The main differences are: (i) we use EPA's 2011 emissions estimates (for 2009 calendar year) (4), except where noted; (ii) we include vented  $CO_2$  emissions in addition to  $CH_4$ ; and (iii) we include a portion of the  $CH_4$  emissions from oil wells, based on the fraction of total energy content produced at U.S. oil wells that is due to natural gas. Like Jaramillo et al., our analysis excludes manufacture of materials for natural gas and electric infrastructure, and energy used in preproduction activities at gas and oil wells. One study quantified preproduction activities for shale gas being less than 10% of the emissions from well to city gate (5).

Table S2 summarizes the  $CH_4$  and noncombustion  $CO_2$  emissions used in our analysis. Combustion  $CO_2$  emissions and the  $CH_4$  emissions from oil wells that we assign to the natural gas fuel cycle were derived using parameters summarized in Table S3. Table S4 includes our estimates of total emissions of  $CH_4$  and  $CO_2$  from the production, processing, transmission/storage and distribution per unit of natural gas delivered.

For the power plant scenario, we convert the emissions in Table S4 into emissions per unit of electricity produced assuming a new Combined Cycle power plant with a heat rate of 6,798 Btu/kWh (6). The upstream emissions for power plant scenarios exclude the distribution segment, based on the assumption that most power plants receive their natural gas directly from the transmission system. The resulting values in Table 1 of the main paper were used for all calculations of the radiative forcing from natural gas power plants.

For the transportation scenario (see Table 1 of the main paper), we additionally include emissions from the distribution segment in the estimates of upstream  $CH_4$  and  $CO_2$ . The upstream  $CO_2$  emissions also include an additional 3.4 kg  $CO_2$ /mmBtu to account for electric compression to produce compressed natural gas (CNG), assuming 0.6 kWh per therm (7) and average U.S. power plant emissions of 1.24 lb/kWh (Table S3). In-use methane emissions from a CNG vehicle are assumed to be 20 times the gasoline value (8). CNG refueling emissions are not explicitly included, but have been reported to be insignificant (9). Vehicle emissions of  $CO_2$  from CNG combustion were derived from values in EPA's Greenhouse Gas Inventory (10). As discussed in Section S6, our emission estimates for the fuel cycle of a CNG car appear to be conservative when compared to results using emissions from the widely cited GREET model.

As described in Section S5, we used different emission factors for the comparison of CNG and diesel for heavy-duty vehicles, adapted from a published analysis specific to that category of vehicle.

**S3. Estimated Emissions from Coal Fuel Cycle.** The scenario modeled for a coal power plant was based on a new supercritical pulverized coal plant with a heat rate of 8,687 Btu/kWh. The emissions were based on a life-cycle analysis performed by the National Energy Technology Laboratory (NETL) (11), except that NETL's emissions estimates were divided by 1.07 to reflect MWh produced (i.e., excluding electric transmission line losses assumed in their analysis) and that we used a range of assumptions about  $CH_4$  emissions from coal mining. NETL's analysis assumed the plant was fueled with underground bituminous coal from a "gassy" mine (360 scf  $CH_4$  per ton coal mined). The power plant scenario analyzed in the main paper (see Table 1) assumed the use of "low-gassy" coal (i.e. from a mine considered to produce less than 71 scf/ton) (12), with only 25% of the upstream  $CH_4$  assumed in NETL's analysis for gassy coal. Such an assumption is also more reflective of  $CH_4$  from surface-mined subbituminous coal, which has relatively low  $CH_4$  emissions (40 scf  $CH_4$ /ton coal or less) (13). To account for the large variability in  $CH_4$  emissions from coal mines, we ran sensitivity tests using revised assumptions described in Section S6.

**S4. Estimated Emissions for Gasoline Fuel Cycle.** The emissions we used to simulate a gasoline fleet of automobiles are summarized in Table 1 of the main paper. Except for the vehicle  $CO_2$  emissions, our estimates were derived from the baseline life-cycle analysis conducted by NETL in support of EPA's recent review of renewable fuels (14). More specifically, we derived our values from those reported in NETL's spreadsheet model (downloaded from <http://www.netl.doe.gov/energy-analyses/refshelf/PubDetails.aspx?Action=View&PubId=283> on April 27, 2011) with selection of the following user-defined inputs: (i) EPA RFS2 tailpipe values (i.e., the EPA November 2009 Profile under "Vehicle Operation" tab); and (ii) 2007 IPCC GWPs. To be consistent with our calculation of  $CH_4$  emissions using Higher Heating Value (HHV), we converted NETL's values, reported as Lower Heating Values, by multiplying by 0.93. The vehicle  $CO_2$  emission factor was independently calculated using EPA data for the gasoline carbon content per gallon (2.421 kg/gallon) (15) and U.S. Energy Information Administration data for the heat content of conventional gasoline (5.253 mmBtu per Barrel, HHV) (16).

In the transportation scenario, we assumed the efficiency of gasoline and CNG automobiles were equal.

**55. Estimated Emissions for Heavy-Duty CNG and Diesel Fuel Cycles.** As summarized in Table 1 of main paper, we adapted published emission factors in mg per ton-mile from a paper by Meyer et al. (17) to compare CNG heavy-duty vehicles to diesel. Because Meyer et al.'s emission factors were developed using a version of the GREET model (see Section S6), which did not yet reflect EPA's 2011 revisions for CH<sub>4</sub> emissions from natural gas systems, we doubled the CH<sub>4</sub> emissions reported by Meyer et al. for the upstream CH<sub>4</sub> from the CNG fuel cycle. Other than this adjustment, the rest of the emission factors in Table 1 were taken directly from Meyer et al.

In the calculations for Fig. 2B of the main paper, which use Eq. 7, we assumed the well-to-wheels leakage of natural gas for heavy-duty CNG vehicles was 3.0% of total gas produced, equal to the value for light-duty CNG vehicles (see Table S1). We made this assumption in the absence of data for pump-to-wheels losses for heavy-duty vehicles, comparable to that provided by Lipman and Delucchi for light-duty vehicles (8). The effective value in Meyer et al. for pump-to-wheels methane losses relative to total well-to-wheels CH<sub>4</sub> losses is 5 percent, which is one-fourth of the effective value we derived from Lipman and Delucchi. According to Eq. 7, which is linear with respect to the assumed leak rate, if our value of well-to-wheels leakage for heavy-duty CNG vehicles is too high, then the cross-over leak rates are also too high. Consequently, our calculation of the cross-over leak rate for heavy-duty CNG vehicles compared to diesel are a conservative estimate (even lower leakage than our calculated value of 1% may, in fact, be required to produce climate benefits on all time frames).

**56. Sensitivity Tests. CNG vs. gasoline.** To test the emissions assumptions in our light-duty automobile scenario, we calculated TWP using emissions factors from two versions of the widely cited GREET model (18). We ran the most recent version of GREET, GREET 1\_2011, in its default mode. GREET 1\_2011 includes, among other things, an update to the upstream CH<sub>4</sub> emissions in the CNG fuel cycle that reflect EPA's 2011 adjustment to the emissions of CH<sub>4</sub> from natural gas systems. We also ran GREET1.8d.1 in its default mode and with one notable modification. Because the GREET 1.8d.1 model does not reflect EPA's 2011 revisions to the CH<sub>4</sub> emissions from natural gas systems (which roughly amounted to a doubling of CH<sub>4</sub> emissions) we doubled the CH<sub>4</sub> emissions predicted by the GREET1.8d.1 model for its CNG Feedstock and Fuel components. Table S5 summarizes the three sets of emissions from the GREET model that we used. Table S6 summarizes the cross-over point of TWP calculations using emissions in Table 1 of the main paper and TWP calculations using the emissions from the GREET model summarized in Table S5. Our results described in the main paper are in closest agreement with the calculation based on emissions from GREET1.8d.1 with the upstream CH<sub>4</sub> adjustment to the CNG fuel cycle. With the modified GREET1.8d.1 assumptions, the onset of net climate benefits is predicted to be 93 years using the Fleet Conversion TWP (52 years for a pulse TWP). These results can be compared with our results presented in Fig. 1 of the main paper (80 and 46 years, for the Continuous TWP and Pulse TWP, respectively). We note that our results are more favorable to the CNG option than both GREET 1\_2011 (the most current version of the model) and GREET1.8d.1, as adjusted, suggesting a possible underestimate of our CNG fuel-cycle emissions, an overestimate of the gasoline fuel-cycle emissions, or both. Our analysis using GREET emissions factors is consistent with the recent analysis by Burnham et al. using the GREET model, which concluded that on a 100-year time horizon, there was no statistically significant difference between the well-to-wheels GHG emissions on kilometer traveled basis of CNG passenger cars and transit buses compared to those using gasoline or diesel fuel (19). Because the results of Burnham et al. are based

on a GWP analysis, they should be compared to our Pulse TWP results presented in Figs. 1 and 2 of the main paper (showing about a 10% reduction and a 2% increase in the cumulative radiative forcing after 100 years for the CNG options relative to the gasoline and diesel options, respectively).

**Natural gas vs. coal.** To account for the uncertainty in the CH<sub>4</sub> emissions from natural gas and coal systems, and the potential for operators to control emissions, we conducted the following sensitivity analysis.

In addition to using the baseline assumptions, upstream CH<sub>4</sub> in the natural gas fuel cycle was doubled and halved to represent a large range of possible leakage in the natural gas system (EPA reports a range of -19% to +30% as the 95% confidence interval for its current inventory). The effect of CH<sub>4</sub> from coal mining was evaluated assuming emissions from a gassy bituminous coal mine (360 scf/ton) in addition to our baseline assumption of a low-gassy mine (75% lower CH<sub>4</sub> than the gassy mine case).

Fig. S2 shows the sensitivity to CH<sub>4</sub> leakage in each fuel cycle of the Fleet Conversion TWP of converting a fleet of efficient coal-fired power plants to combined cycle natural gas plants. Scenario A in Fig. S2 shows that if leakage in the natural gas supply is sufficiently increased then natural gas can become worse than coal for some period of time. We estimate that natural gas produces net climate benefits relative to low-gassy coal on all time frames as long as leakage in the natural gas system is less than 3.2% from well through delivery at a power plant (i.e., excluding the local distribution system). If the comparison is with less efficient coal plants using higher CH<sub>4</sub> coal types, even higher leakage in the natural gas system could still yield climate benefits. The potential for improving the carbon benefits of natural gas used for electricity can be seen by comparing scenarios C and E, or B and D in Fig. S2; halving upstream leakage in natural gas system reduces the TWP of natural gas power plants compared to coal by 20% and 12% after 20 and 100 years, respectively. Alternatively, capturing coal mine CH<sub>4</sub> emissions (or using coal from low-gassy underground or surface mines) can also improve coal's climate footprint compared to natural gas power plants, as can be seen by comparing scenarios B and C in Fig. S2.

**57. Comparison to the Paper by Howarth et al.** Our conclusion that natural gas produces net climate benefits relative to certain types of coal reaches the opposite conclusion of Howarth et al. (20) for three principal reasons. The main difference is that Howarth et al. assume much greater methane emissions than we do. As described above, we estimate that 2.1% of natural gas produced is lost annually between the well and the power plant (including the local distribution system, we estimate that the natural gas emitted is 2.4% of gross natural gas production). Howarth et al. used a range of 3.6–7.9% for shale gas and 1.7–6.0% for conventional gas (as a percentage of the CH<sub>4</sub> produced over the life-cycle of a well—also a different metric than we used). From our sensitivity analysis, we conclude that natural gas produces net climate benefits relative to low-gassy coal as long as leakage in the natural gas system is less than 3.2% from well through delivery at a power plant. Second, for the power plant scenario, we did not consider emissions from the local distribution system, under the conservative assumption that most natural gas power plants tie directly into transmission pipelines. Finally, Howarth et al. used higher methane GWP values, reflecting recent evidence that the indirect radiative forcing of methane is larger than the IPCC estimates that we used (21).

**58. Data from City of Fort Worth Natural Gas Air Quality Study.** The calculations of emissions and leak rates from well sites with no compressor engines were based on data reported in Appendix 3b of the Final Report of the City of Fort Worth Natural Gas Air Quality Study (22). Excel worksheets containing relevant data

from the Fort Worth study and our calculations are available in Dataset S1.

### S9. SO<sub>2</sub> Emissions from Coal Plants in the United States and China.

Table S7 summarizes emissions and emission factors of SO<sub>2</sub> from coal-fired power plants in the United States and China. The main paper compares these values with the emission factors used by

Wigley to characterize the global fleet: 12 TgS/GtC in 2010, declining linearly to 2 TgS/GtC in 2060 (23). The values for the calculated emission rates for U.S. coal plants in Table S7 were our own calculations using the selected units to enable comparisons to the Wigley paper and to reported emission rates from China; otherwise the values are in the units reported in the source material.

- Kirchgessner DA, Lott RA, Cowgill RM, Harrison MR, Shires TM (1997) Estimate of methane emissions from the U.S. natural gas industry. *Chemosphere* 35:1365–1390.
- U.S. Environmental Protection Agency (2011) *Inventory of U.S. Greenhouse Gas Emissions and Sinks: 1990-2009* (EPA Publication 430-R-11-005), p 3–45.
- Jaramillo P, Griffin WM, Matthews HS (2007) Comparative life-cycle air emissions of coal, domestic natural gas, LNG, and SNG for Electricity Generation. *Environ Sci Technol* 41:6290–6296.
- U.S. Environmental Protection Agency (2011) *Inventory of U.S. Greenhouse Gas Emissions and Sinks: 1990-2009* (EPA Publication 430-R-11-005).
- Jiang, M et al., (2011) Life cycle greenhouse gas emissions of Marcellus shale gas. *Environ Res Lett* 6:034014 (doi:10.1088/1748-9326/6/3/034014).
- National Energy Technology Laboratory (2010) *Cost and Performance Baseline for Fossil Energy Plants; Volume 1: Bituminous Coal and Natural Gas to Electricity*, DOE/NETL-2010/1397, Exhibit ES-2.
- TIAX LLC (2007) *Full Fuel Cycle Well to Tank Energy Assessment, Inputs Emissions and Water Impacts*, prepared for the California Energy Commission (CEC-600-2007-002-D), p 7–8.
- Lipman TE, Delucchi MA (2002) Emissions of nitrous oxide and methane from conventional and alternative fuel motor vehicles. *Clim Change* 53:477–516.
- Transportation Research Board, *Research Results Digest Number 25* (April 1998), Technology Assessment of Refueling-Connection Devices for CNG, LNG, and Propane (appendix A).
- US EPA (2010) *Inventory of Greenhouse Gas Emissions and Sinks 1990-2008*, Table A-33.
- National Energy Technology Laboratory (September 30, 2010) *Life Cycle Analysis: Supercritical Pulverized Coal (SCPC) Power Plant*, Table ES-2, (DOE/NETL-403-110609).
- National Energy Technology Laboratory (September 2010) *Quality Guidelines for Energy System Studies: Methane Emissions from Mining Illinois Basin Coals* (DOE/NETL-2010/1445).
- National Energy Technology Laboratory (September 2010) *Quality Guidelines for Energy System Studies: Methane Emissions from Mining Powder River Basin Coals* (DOE/NETL-2010/1446).
- National Energy Technology Laboratory, (November 26, 2008) *Development of Baseline Data and Analysis of Life Cycle Greenhouse Gas Emissions of Petroleum-Based Fuels*, DOE/NETL-2009/1346.
- U.S. EPA (2005) *Emission Facts: Average Carbon Dioxide Emissions Resulting from Gasoline and Diesel Fuel* (EPA420-F-05-001).
- U.S. Energy Information Administration *Annual Energy Review 2009*, Appendix A.
- Meyer PE, Green EH, Corbett JJ, Mas C, Winebrake JJ (2011) Total fuel-cycle analysis of heavy-duty vehicles using biofuels and natural gas-based alternative fuels. *J Air Waste Manage Assoc* 61:285–294.
- Argonne National Laboratory, The Greenhouse Gases, Regulated Emissions, and Energy Use in Transportation (GREET) Model. <http://greet.es.anl.gov/>.
- Burnham A, et al. (2012) Life-cycle greenhouse gas emissions of shale gas, natural gas, coal and petroleum. *Environ Sci Technol* 46:619–627.
- Howarth RW, Santoro R, Ingraffea A (2011) Methane and the greenhouse-gas footprint of natural gas from shale formations. *Clim Change* 106:679–690.
- Shindell DT, et al. (2009) Improved attribution of climate forcing to emissions. *Science* 326:716–718.
- Eastern Research Group and Sage Environmental Consulting (2011) *City of Fort Worth Natural Gas Air Quality Study*. Available at <http://fortworthtexas.gov/gaswells/default.aspx?id=87074>.
- Wigley TML (2011) Coal to gas: The influence of methane leakage. *Clim Change* 108:601–608.
- Lu Z, Zhang Q, Streets DG (2011) Sulfur dioxide and primary carbonaceous aerosol emissions in China and India, 1996–2010. *Atmos Chem Phys* 11: 9839–9864.

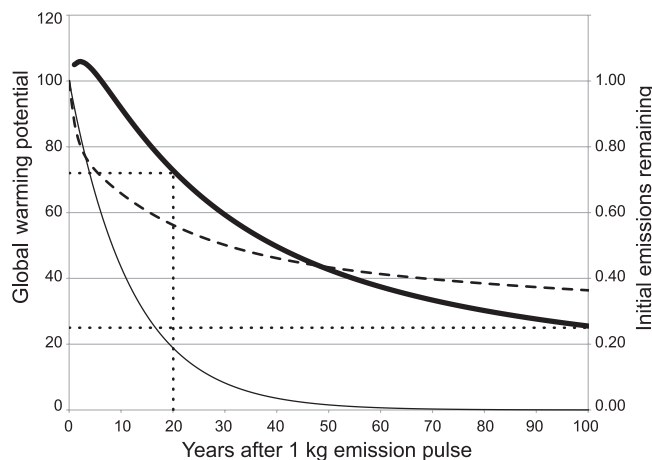

**Fig. S1.** (A) Decay of 1-kg pulses of CH<sub>4</sub> and CO<sub>2</sub> emissions emitted at time = 0 (thin solid line and dashed line, respectively, with scale shown on right axis) governed by the decay functions given by Eq. 5 and Eq. 6, respectively; (B) The bold solid line shows the variation with time horizon of the global warming potential (GWP) of CH<sub>4</sub>, which is the analytic solution of Eq. 1 (scale shown on left axis). The commonly cited GWPs for CH<sub>4</sub> are indicated by the dotted lines (25 and 72 over 100-year and 20-year time horizons, respectively).

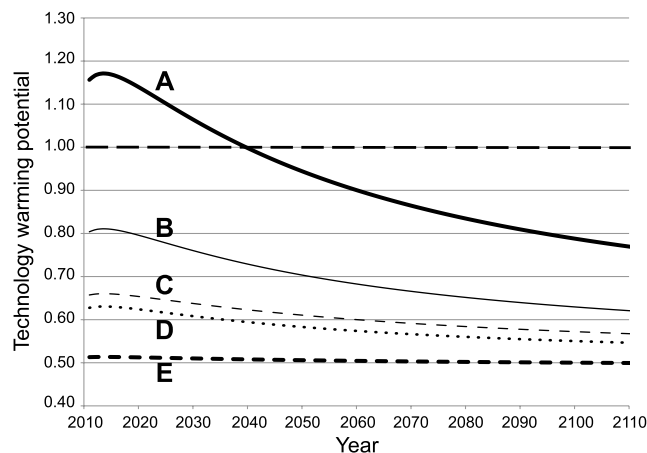

**Fig. S2.** Sensitivity to upstream CH<sub>4</sub> emissions of the Fleet Conversion TWP of a combined cycle natural gas (NG) plant relative to a supercritical pulverized coal plant, assuming the conversion occurs in 2011 and the following adjustments are made to the base CH<sub>4</sub> emission factors: (A) 2x Base NG CH<sub>4</sub> vs. low-gassy coal; (B) Base NG CH<sub>4</sub> vs. low-gassy coal; (C) Base NG CH<sub>4</sub> vs. gassy coal; (D) 0.5x Base NG CH<sub>4</sub> vs. low-gassy coal; (E) 0.5x Base NG CH<sub>4</sub> vs. gassy coal. Scenario B is the one shown in Fig. 1 of the main paper, which assumed natural gas emissions equal to EPA's 2011 leak rate for the U.S. natural gas supply to the City Gate (2.1%, see text) and low-gassy coal (approximately 90 scf per ton of coal). The natural gas leak rate was doubled (Scenario A) and halved (Scenarios D and E) from the base case. Gassy coal (representing underground coal mine CH<sub>4</sub> emissions of 360 scf per ton of coal) is simulated in Scenarios C and E. See discussion in Section S6.

**Table S1. Reference leak rates,  $L_{REF}$ , used in this paper**

| Portion of fuel cycle covered                           | Applicable scenario | $L_{REF}$ |
|---------------------------------------------------------|---------------------|-----------|
| Well-to-city gate (excludes local distribution systems) | Power plant         | 2.1%      |
| Well-to-wheels *                                        | Vehicles            | 3.0%      |

\*In addition to the Well-to-city gate rate, includes 0.3% for local distribution systems and 0.6% for in-use CNG vehicle emissions.

**Table S2. 2009 methane and noncombustion CO<sub>2</sub> emissions associated with U.S. natural gas supply (from EPA 2011 GHG EI)\***

|                      | CH <sub>4</sub> Emissions (Tg CH <sub>4</sub> ) | CO <sub>2</sub> Emissions (MMTCO <sub>2</sub> ) |
|----------------------|-------------------------------------------------|-------------------------------------------------|
| Production           | 6.7                                             | 10.9                                            |
| Processing           | 0.84                                            | 21.2                                            |
| Transmission/storage | 2.1                                             | 0.1                                             |
| Distribution         | 1.4                                             | 0.0                                             |
| Total                | 11.0                                            | 32.2                                            |

\*35% of CH<sub>4</sub> emissions and 0% of CO<sub>2</sub> emissions from petroleum systems were allocated to the natural gas supply using the calculation described in Table S3.



**Table S3. Data used in this analysis**

| Parameter                                                                                             | Value          | Source                                                                                                                                                 |
|-------------------------------------------------------------------------------------------------------|----------------|--------------------------------------------------------------------------------------------------------------------------------------------------------|
| Emissions from natural gas (NG) and petroleum systems                                                 | See Table S2   | EPA, Inventory of U.S. Greenhouse Gas Emissions and Sinks: 1990–2009, April 2011                                                                       |
| NG delivered to consumers (*) (bcf, 2009)                                                             | 20,966         | EIA Natural Gas Annual 2009, Table 1                                                                                                                   |
| CO <sub>2</sub> from power plant combustion of pipeline natural gas (lb CO <sub>2</sub> /mmBtu, 2008) | 117            | EPA, Inventory of U.S. Greenhouse Gas Emissions and Sinks: 1990–2008, (April 2010) Table A-33                                                          |
| Heat content of natural gas (Btu/cubic foot, 2009)                                                    | 1,026          | EIA Annual Energy Review 2009, Table A4                                                                                                                |
| CO <sub>2</sub> from upstream natural gas combustion (lb CO <sub>2</sub> /million scf)                | 112,860        | Calculated from AP-42 emission factor for stationary gas turbines of 110 lb/MMBtu [AP-42, Table 3.1-2a (April 2000)] and heat content of 1,026 Btu/scf |
| Calculated mmBtu delivered (2009)                                                                     | 21,511,116,000 | Calculated from NG delivered and heat content of natural gas                                                                                           |
| NG use—lease fuel (bcf, 2009)                                                                         | 913            | EIA Natural Gas Annual 2009, Table 1                                                                                                                   |
| NG use—plant fuel (bcf, 2009)                                                                         | 362            | EIA Natural Gas Annual 2009, Table 1                                                                                                                   |
| NG use—pipeline and distribution (bcf, 2009)                                                          | 598            | EIA Natural Gas Annual 2009, Table 1 (50% assumed to be for transmission pipeline)                                                                     |
| Electric use pipeline compression (GWh, 2008)                                                         | 2,937          | Transportation Energy Data Book, Edition 29-2010 (50% assumed to be for transmission pipeline)                                                         |
| Total CO <sub>2</sub> from U.S. power plants (MMTCO <sub>2</sub> , 2009)                              | 2,154          | EPA, Inventory of U.S. Greenhouse Gas Emissions and Sinks: 1990–2009, April 2011, Table 3-1                                                            |
| Total electric power sector generation (GWh, 2009)                                                    | 3,814,300      | EIA, Annual Energy Review 2009, Table 8.2b                                                                                                             |
| Average CO <sub>2</sub> emissions factor U.S. power plants (lb/MWh, 2009)                             | 1,242          | Calculated from total CO <sub>2</sub> divided by total electric generation                                                                             |
| Gross heat content of U.S. crude oil production (mmBtu/barrel)                                        | 5.8            | EIA, International Energy Annual 2006, Table C.3                                                                                                       |
| U.S. crude oil production (billion barrels, 2009)                                                     | 1.9            | EIA, Annual Energy Review 2009, Table 5.2                                                                                                              |
| Natural gas from oil wells (bcf, 2009)                                                                | 5,813          | EIA, Natural Gas Annual 2009, Table 3                                                                                                                  |
| Natural gas fraction of total energy content from oil wells (2009)                                    | 0.35           | Calculated by dividing mmBtu of natural gas from oil wells into total mmBtu from oil and gas produced from oil wells                                   |

\*Gross natural gas production in 2009 was 26.0 tcf. EIA Natural Gas Annual 2009, Table 3 (includes Gas Wells + Oil Wells + Coalbed Methane). Our TWP calculations use the amount of gas delivered to reflect the upstream fuel-cycle emissions per unit of gas combusted at the power plant or vehicle. Our calculations of the effective leak rates use the amount of gas produced to reflect losses over the entire fuel cycle.

**Table S4. Natural gas fuel-cycle emissions (kg per mmBtu of natural gas delivered to consumers)**

|                      | Vented/<br>leaked<br>CH <sub>4</sub> | Vented/<br>leaked<br>CO <sub>2</sub> | Natural gas combustion CO <sub>2</sub> |            |          | Electric<br>compression<br>CO <sub>2</sub> | Power<br>plant<br>CO <sub>2</sub> |
|----------------------|--------------------------------------|--------------------------------------|----------------------------------------|------------|----------|--------------------------------------------|-----------------------------------|
|                      |                                      |                                      | Lease fuel                             | Plant fuel | Pipeline |                                            |                                   |
| Production           | 0.31                                 | 0.5                                  | 2.2                                    | 0.0        | 0.0      | 0.0                                        | 0.0                               |
| Processing           | 0.039                                | 1.0                                  | 0.0                                    | 0.9        | 0.0      | 0.0                                        | 0.0                               |
| Transmission/storage | 0.098                                | 0.0                                  | 0.0                                    | 0.0        | 0.7      | 0.04                                       | 0.0                               |
| Distribution         | 0.064                                | 0.0                                  | 0.0                                    | 0.0        | 0.7      | 0.04                                       | 0.0                               |
| Power plant          | 0.0                                  | 0.0                                  | 0.0                                    | 0.0        | 0.0      | 0.0                                        | 53.1                              |

**Table S5. GREET model emission factors used in sensitivity tests (2010 fleet forecast)**

|                                                                 | GREET1.8d.1<br>(unadjusted) |          | GREET1.8d.1<br>(adjusted) |          | GREET 1_2011 |          |
|-----------------------------------------------------------------|-----------------------------|----------|---------------------------|----------|--------------|----------|
|                                                                 | CNG                         | Gasoline | CNG                       | Gasoline | CNG          | Gasoline |
| Vehicle CO <sub>2</sub> (g CO <sub>2</sub> /mi)                 | 307                         | 377      | 307                       | 377      | 307          | 377      |
| Vehicle CH <sub>4</sub> (g CH <sub>4</sub> /mi)                 | 0.15                        | 0.015    | 0.15                      | 0.015    | 0.15         | 0.015    |
| Upstream CO <sub>2</sub> (well-to-pump) (g CO <sub>2</sub> /mi) | 58                          | 78       | 58                        | 78       | 59           | 80       |
| Upstream CH <sub>4</sub> (well-to-pump) (g CH <sub>4</sub> /mi) | 1.3                         | 0.53     | 2.6*                      | 0.53     | 3.3          | 0.65     |

\*The GREET1.8d.1 default output was doubled to obtain this value (see text).

**Table S6. Comparison of years to reach climate benefits for gasoline-to-CNG fuel switch using our TWP results compared to TWP calculated with emissions from the GREET model**

| Emissions source          | Years until climate benefits reached |           |
|---------------------------|--------------------------------------|-----------|
|                           | Fleet Conversion TWP                 | Pulse TWP |
| This analysis             | 80                                   | 46        |
| GREET 1_2011              | 134                                  | 72        |
| GREET 1.8d.1 (unadjusted) | 7                                    | 5         |
| GREET 1.8d.1 (adjusted)   | 93                                   | 52        |

**Table S7. Emissions and emission factors for U.S. and Chinese coal plants discussed in this paper\***

| Year             | U.S. coal plants                  |                                   |                                       |                                                        | Chinese coal plants (24)                 |                      |                                          |
|------------------|-----------------------------------|-----------------------------------|---------------------------------------|--------------------------------------------------------|------------------------------------------|----------------------|------------------------------------------|
|                  | SO <sub>2</sub><br>(million tons) | CO <sub>2</sub><br>(million tons) | Heat input<br>(10 <sup>6</sup> mmBtu) | Calculated<br>emission rate<br>(g SO <sub>2</sub> /GJ) | Calculated<br>emission rate<br>(TgS/GtC) | SO <sub>2</sub> (Gg) | Emission rate<br>(g SO <sub>2</sub> /GJ) |
| 2000             | 10.7                              | 2,122                             | 20,661                                | 445                                                    | 9.3                                      | 9,959                | 849                                      |
| 2004             | N/A                               | N/A                               | N/A                                   | N/A                                                    | N/A                                      | 15,665               | 796                                      |
| 2008             | N/A                               | N/A                               | N/A                                   | N/A                                                    | N/A                                      | 12,486               | 433                                      |
| 2010             | 5.05                              | 1,981                             | 19,038                                | 229                                                    | 4.7                                      | 6,587                | 204                                      |
| 2014 (projected) | 3.36                              | 1,981 <sup>†</sup>                | N/A                                   | N/A                                                    | 3.1                                      | N/A                  | N/A                                      |

\*U.S. values for 2000 and 2010 are from a query of the U.S. Environmental Protection Agency's Clean Air Markets, Data and Maps Web site <http://camddataandmaps.epa.gov/gdm/index.cfm?fuseaction=emissions.wizard>, performed on December 5, 2011. U.S. values for 2014 were obtained from the U.S. EPA's 2014 projection provided as part of the Technical Support Documents for the Final Cross-State Air Pollution Rule (CSAPR) and the Supplemental Notice of Proposed Rulemaking (SNPR): <http://www.epa.gov/airtransport/techinfo.html>; 2014 includes some emissions from noncoal units. We did not analyze data indicated by N/A for U.S. coal plants for 2004 and 2008 (intermediate years for our analysis but provided to capture estimates of Chinese emissions); no 2014 projection was available for Chinese emissions.

<sup>†</sup>We assumed this value would remain constant between 2010 and 2014.

#### Other Supporting Information Files.

##### Dataset S1 (XLSX)

Shows calculations of TWP and L\* using Eq. 2 and Eq. 7 of the main paper, respectively (tabs "Calcs-Transp," "Calcs-Power," and "Calcs GREET LD"); GWP calculations using Eq. 1 (tab "GWP"); and calculations using data from the Fort Worth study (tabs "EDF analysis of FW data" and "Raw FW Data").
